# Images in Anesthesiology: Airway Management in Patients with Tracheal Bronchus

Fanny Wong, M.D., Frank Detterbeck, M.D., Viji Kurup, M.D.

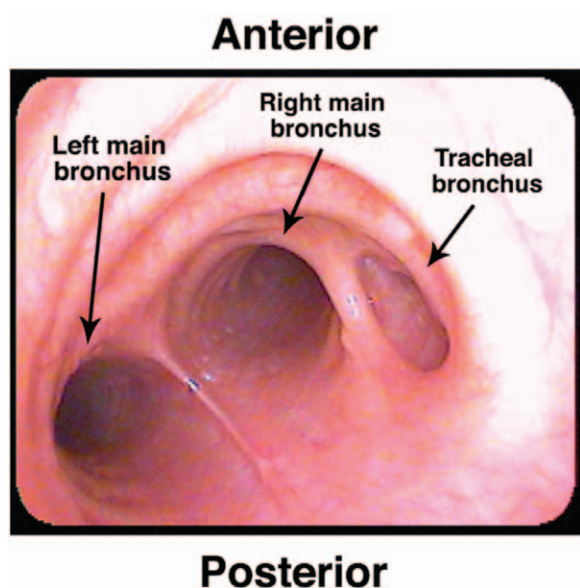

**T**RACHEAL bronchus (TB) is an aberrant, accessory, or ectopic bronchus arising almost exclusively from the right side of the tracheal wall above the carina, with the incidence of approximately 0.1% to 5% of the population.<sup>1,2</sup> We present an image of a fiberoptic bronchoscopy performed in a patient with known TB for video-assisted thoracoscopic surgery and left lower lobectomy (fig.).

Although the existence of TB has been described as early as 1957, it is not a common differential for intraoperative desaturations.<sup>3</sup> In the image, the TB arises a few millimeters above the carina. It is important to recognize a TB by bronchoscopy because when present, a properly placed tracheal tube cuff can obstruct the right upper lobe (RUL) or the tube itself can migrate into a TB, causing pulmonary atelectasis, hypoxemia, or both.<sup>4,5</sup>

Preoperative diagnosis of this anomaly is especially important when lung isolation is needed. For left lung isolation, a bronchial blocker can be placed into the left main bronchus. A left-sided double-lumen tube (DLT) can also be used, but care must be taken not to obstruct the RUL by the tracheal cuff. For right-sided lung isolation, a right DLT should not be used, as the opening for the RUL will not correspond to the location of

the TB. However, a left-sided DLT can be used. If left DLT cannot be placed for any reason, a Fogarty catheter can be placed in the TB and a bronchial blocker placed into the right main bronchus.<sup>6</sup>

## Acknowledgments

The authors thank Garrett Sendlewski, B.F.A., Yale Anesthesia Media Lab, Department of Anesthesiology, Yale University School of Medicine, New Haven, Connecticut, for labeling graphics used in this article.

## Competing Interests

The authors declare no competing interests.

## Correspondence

Address correspondence to Dr. Wong: fanny.wong@yale.edu

## References

1. Barat M, Konrad HR: Tracheal bronchus. *Am J Otolaryngol* 1987; 8:118–22
2. Lee DK, Kim YM, Kim HZ, Lim SH: Right upper lobe tracheal bronchus: Anesthetic challenge in one-lung ventilated patients—A report of three cases. *Korean J Anesthesiol* 2013; 64:448–50
3. The tracheal bronchus. *ANESTHESIOLOGY* 1957; 18:523
4. Ikeno S, Mitsuhashi H, Saito K, Hirabayashi Y, Akazawa S, Kasuda H, Shimizu R: Airway management for patients with a tracheal bronchus. *Br J Anaesth* 1996; 76:573–5
5. Vredevoe LA, Brechner T, Moy P: Obstruction of anomalous tracheal bronchus with endotracheal intubation. *ANESTHESIOLOGY* 1981; 55:581–2
6. Lee HL, Ho AC, Cheng RK, Shyr MH: Successful one-lung ventilation in a patient with aberrant tracheal bronchus. *Anesth Analg* 2002; 95:492–3

From the Departments of Anesthesiology (F.W., V.K.) and Thoracic Surgery (F.D.), Yale University School of Medicine, New Haven, Connecticut.  
Copyright © 2016, the American Society of Anesthesiologists, Inc. Wolters Kluwer Health, Inc. All Rights Reserved. *Anesthesiology* 2016; 125:395
